# Supplementary material for: Guanidine-based polycarbonate hydrogels: from metal-free ring-opening polymerization to reversible self-assembling properties
Source: Royal Society of Chemistry journal article supplement (doi:10.1039/c1sm05581j), 2011-01-01
Supplement: c1sm05581j.pdf [file c1sm05581j.pdf]

## Guanidine-based polycarbonate hydrogels: from metal-free ring-opening polymerization to reversible self-assembling properties

Christophe Bartolini, Laetitia Mespouille,\*  
Ingrid Verbruggen, Rudolph Willem and Philippe Dubois

Electronic Supporting Information (ESI) (DOI : 10.1039/c1sm05581j)

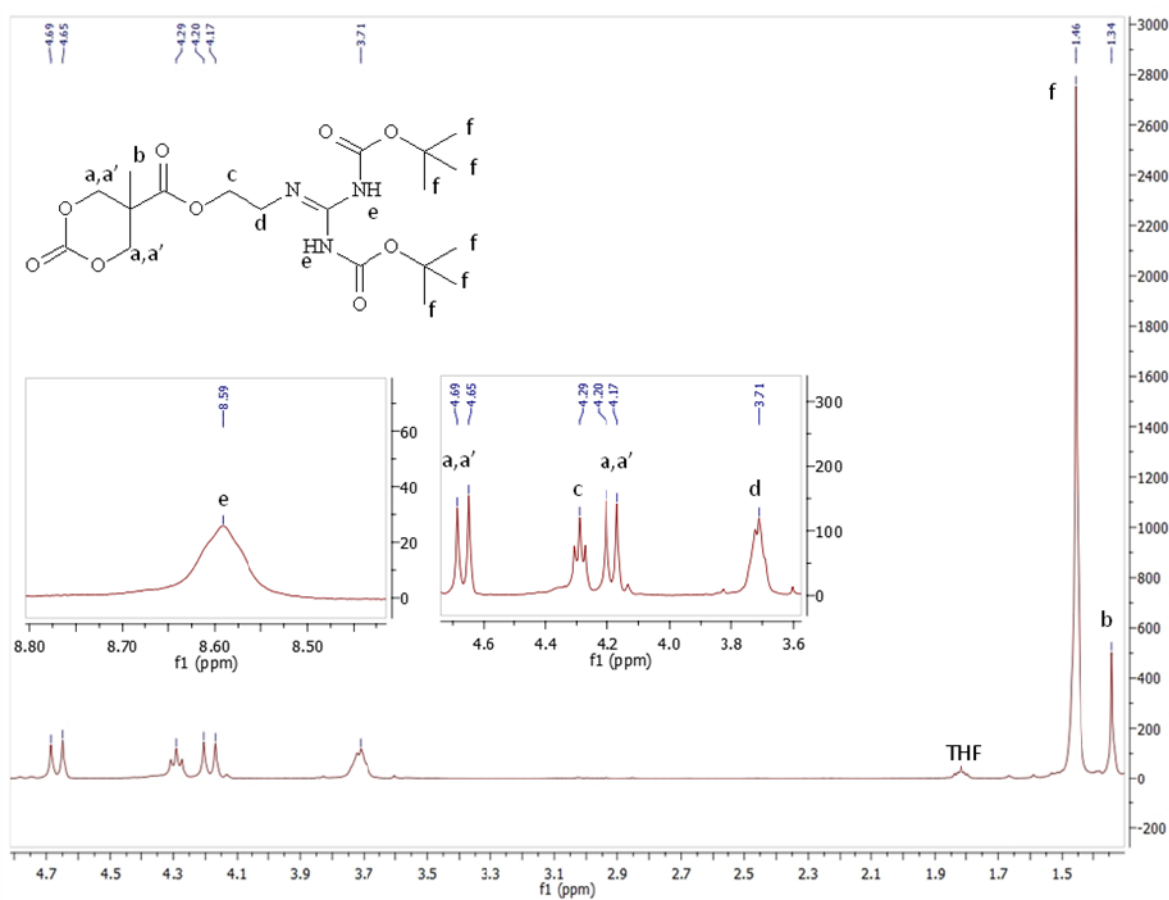

S1 :  $^1\text{H}$  NMR spectrum of trimethylenecarbonate-5-methyl-5carboxyethylguanidine-1,3-tert-butylloxycarbonyl (MTCGuaBOC) **1** (300 MHz,  $\text{CDCl}_3$ )

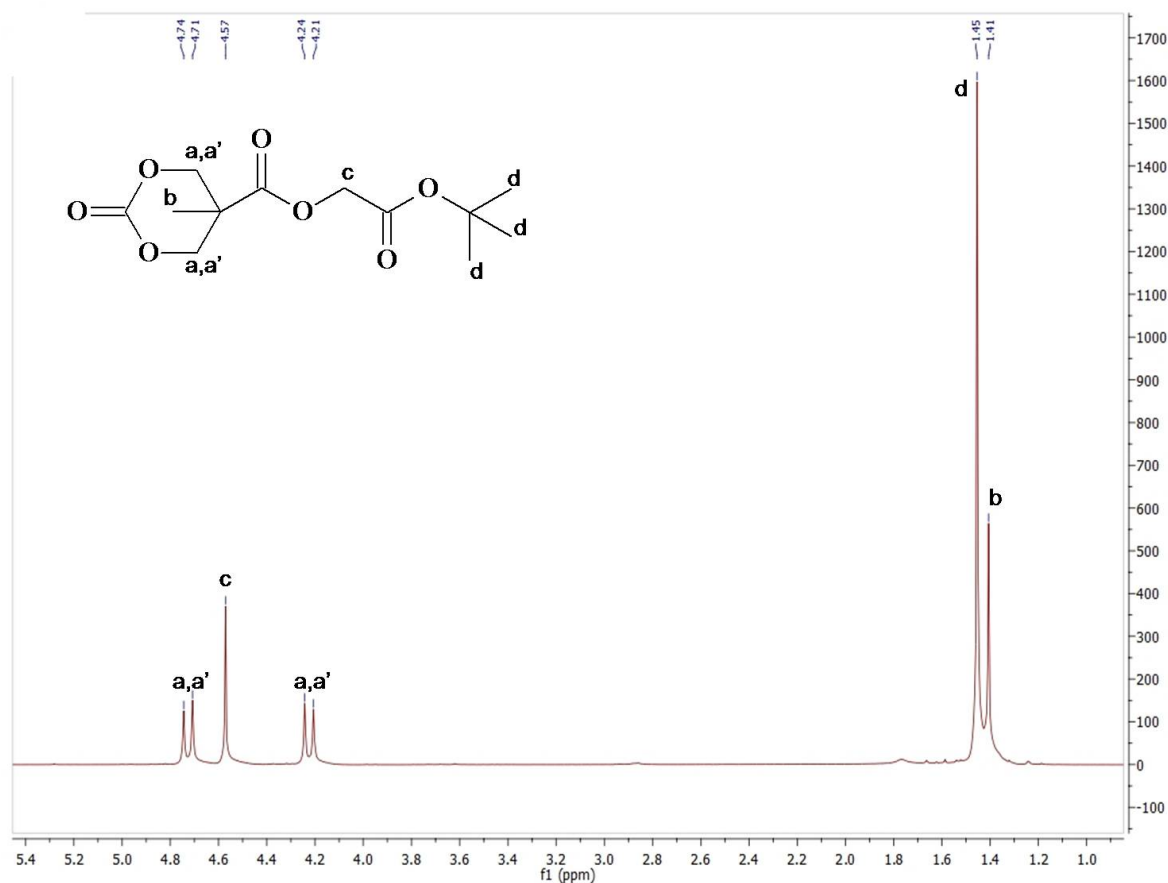

S2 :  $^1\text{H}$  NMR spectrum of trimethylenecarbonate-5-methyl-5-carboxy-tertbutylacetate (MTC-tBac) (MTC-tBac) **2** (300 MHz,  $\text{CDCl}_3$ )

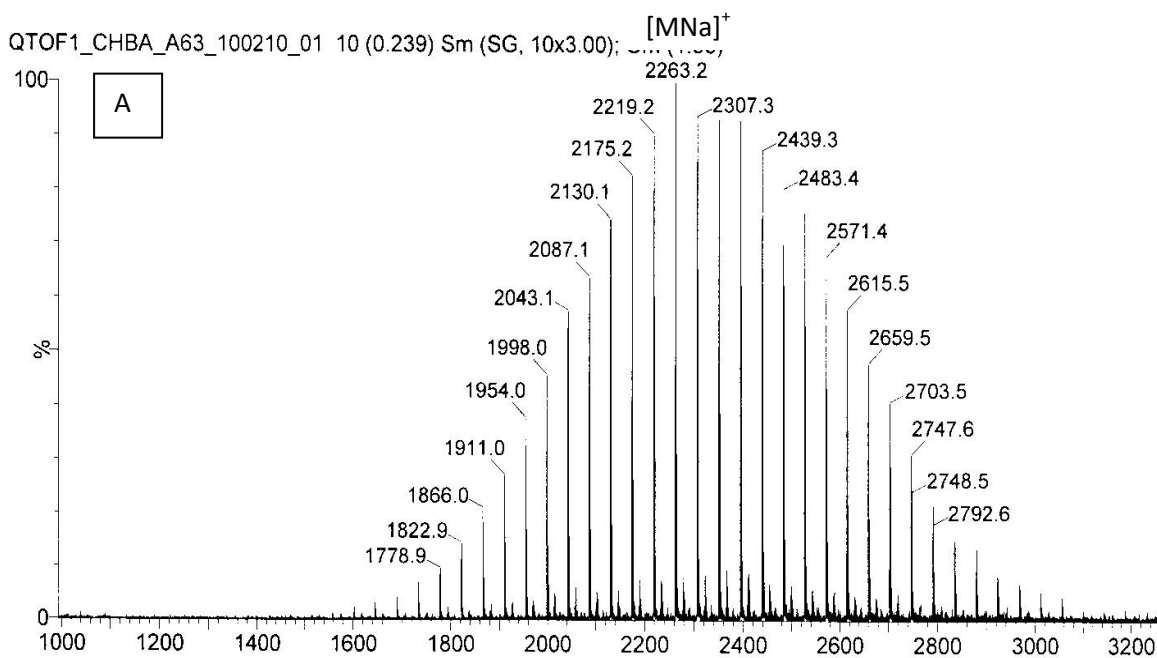

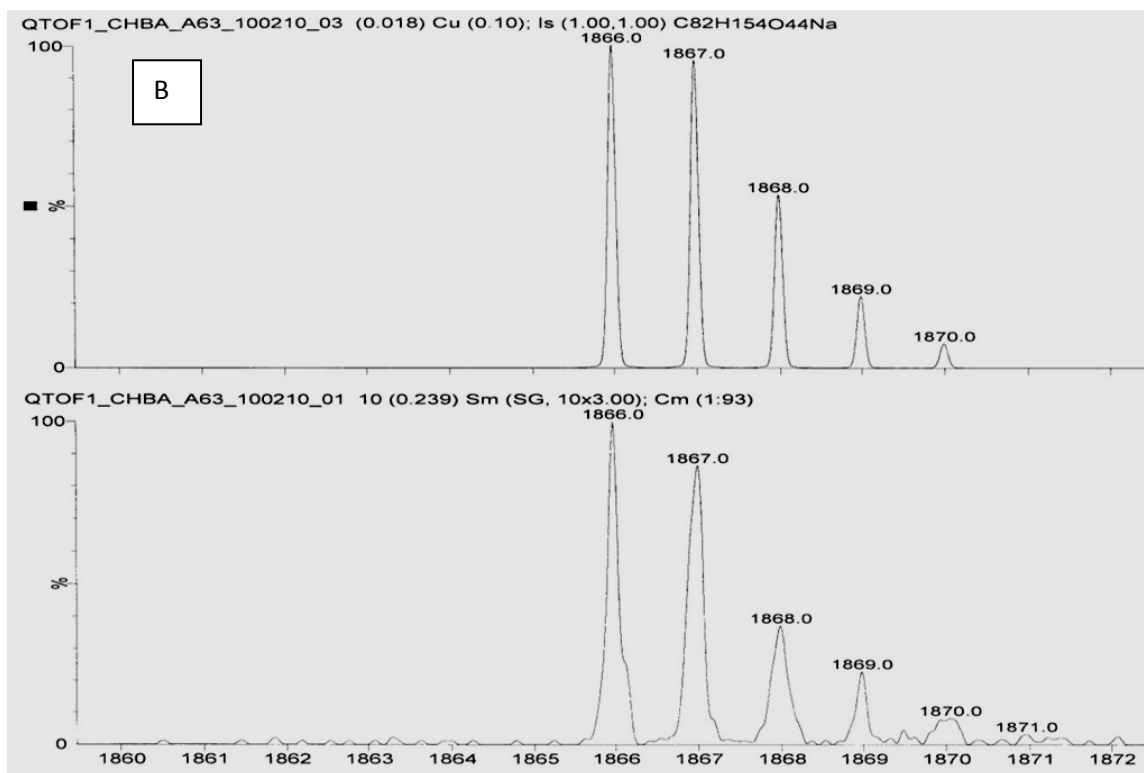

S3: A) Mass distribution of poly(ethylene oxide)- $\alpha,\omega$ -methylcarboxy trimethylene carbonate (MTC-PEO-MTC) obtained by MALDI-ToF; and B) comparison between theoretical isotopic mass (top) and experimental (bottom) distribution for  $m/z$  1866.
